# Supplementary material for: Development of a Flavor Ingredient Wheel Linking E-Liquid Additives to the Labeled Flavor of Vaping Products
Source: Toxics. 2024 May 18;12(5):372. doi: 10.3390/toxics12050372 (PMC11125894; doi:10.3390/toxics12050372)
Supplement: Supplementary file 1 [file toxics-12-00372-s001.zip › Revised Table 1 with Full Reference Hyperlinks.xlsx]

## Sheet: Sheet1
Identified Molecule from NIST Library	IUPAC Chemical Name	Common Name	Flavor Profile	Physical Properties	FEMA #	CAS #	HMDB #	Super Class	Chemical Class; Annotation Source	database referenced	database referenced	database referenced
3-Hexen-1-ol, (Z)-	(Z)-hex-3-en-1-ol	leaf alcohol	Grass, Green Fruit, Green Leaf, Herb, Unripe Banana	oily liquid	2563	928-96-1;544-12-7	NA	alcohol	fatty alcohol; HMDB	https://www.femaflavor.org/flavor-library/cis-3-hexenol	https://pubchem.ncbi.nlm.nih.gov/compound/cis-3-Hexen-1-ol
1,3-Dioxolane, 4-methyl-2-phenyl-	4-methyl-2-phenyl-1,3-dioxolane	benzaldehyde propylene glycol acetal	floral	colorless to pale yellow clear oily liquid	2130	2568-25-4	NA	cyclic	benzene and substituted derivitives; HMDB	https://www.femaflavor.org/flavor-library/benzaldehyde-propylene-glycol-acetal	https://pubchem.ncbi.nlm.nih.gov/compound/595928
Acetic acid, pentyl ester	pentyl acetate	amyl acetate, isoamyl acetate, isovaleric acid	apple, banana, glue, pear	clear colorless liquid	2055	628-63-7; 123-92-2	39095	ester	carboxylic acid ester; HMDB	https://hmdb.ca/metabolites/HMDB0039095	https://pubchem.ncbi.nlm.nih.gov/compound/12348	https://www.femaflavor.org/flavor-library/isoamyl-acetate
Butanoic acid, 3-methyl-, ethyl ester ***	NA	isovaleric acid derivative	NA	NA	2055	108-64-5	NA	NA	NA	https://pubchem.ncbi.nlm.nih.gov/compound/7945
1-Butanol, 3-methyl-, acetate ***	NA	isoamyl acetate derivative	NA	NA	2055	123-92-2	NA	NA	NA	https://pubchem.ncbi.nlm.nih.gov/compound/31276
2-Cyclohexen-1-one, 2-methyl-5-(1-methylethenyl)-, (R)-	(5S)-2-methyl-5-propan-2-ylcyclohex-2-en-1-one	carvotanacetone	Basil, Bitter, Caraway, Fennel, Mint	NA	2249	6485-40-1; 2244-16-8; 99-49-0	35824	cyclic	menthane monoterpenoid; HMDB	https://hmdb.ca/metabolites/HMDB0035824	https://www.femaflavor.org/flavor-library/carvone	https://pubchem.ncbi.nlm.nih.gov/compound/439570
1,3-Benzodioxole, 5-(4-methyl-1,3-dioxolan-2-yl)-	4-(4-Methyl-1,3-dioxolan2-yl)-1,3-benzodioxole 4-Methyl-2-(3,4-methylenedioxyphenyl)- 1,3-dioxolane	Piperonal Propyleneglycol Acetal, or heliotropin	floral, sweet powdery coconut, vanilla, cherry, spice	pale yellow or colorless liquid	4622	61683-99-6	37286	cyclic	1,3-dioxolanes; HMDB	https://hmdb.ca/metabolites/HMDB0037286	https://pubchem.ncbi.nlm.nih.gov/compound/101144	https://www.femaflavor.org/flavor-library/piperonal-propyleneglycol-acetal
Butyl caproate-	butyl hexanoate	butyl caproate	fruit, grass, green, berry, pineapple, wine	colorless clear liquid	2201	626-82-4	40211	ester	fatty acid ester; HMDB	https://www.femaflavor.org/flavor-library/butyl-hexanoate	https://pubchem.ncbi.nlm.nih.gov/compound/12294	https://hmdb.ca/metabolites/HMDB0040211
Butanoic acid, 2-methyl-, ethyl ester	ethyl 2-methylbutanoate	Ethyl 2-methylbutyrate	Apple, Ester, Green Apple, Kiwi, Strawberry	NA	2443	7452-79-1	33745	ester	fatty acid ester; HMDB	https://hmdb.ca/metabolites/HMDB0033745	https://www.femaflavor.org/flavor-library/ethyl-2-methylbutyrate	https://pubchem.ncbi.nlm.nih.gov/compound/24020
Butanoic acid, 2-methyl-	2-methylbutanoic acid	Active Valeric Acid	Butter, Cheese, Fermented, Sour, fruity, dirty	colorless to pale yellow clear liquid	2695	116-53-0	NA	acid	alkyl carboxylic acid; IFA	https://gestis.dguv.de/data?name=492807&lang=en	https://pubchem.ncbi.nlm.nih.gov/compound/8314	https://www.femaflavor.org/flavor-library/2-methylbutyric-acid
4H-Pyran-4-one, 2-ethyl-3-hydroxy- Ethyl maltol	2-ethyl-3-hydroxypyran-4-one	ethyl maltol, no. 64	fruit, sweet, bitter, candy, caramalized sugar, cooked fruit	white solid	3487	4940 11 8	31735	cyclic	pyranone; HMDB	https://pubchem.ncbi.nlm.nih.gov/compound/21059	https://hmdb.ca/metabolites/HMDB0031735	https://www.femaflavor.org/flavor-library/ethyl-maltol
Benzene, 1-methyl-2-(1-methylethyl)-	1-methyl-2-propan-2-ylbenzene	O-Cymene	NA	flammable colorless liqud	NA	527-84-4	37050	cyclic	cumene; HMDB	https://hmdb.ca/metabolites/HMDB0037050
2H-1-Benzopyran-2-one, 6-methyl-	6-methyl-4-(morpholin-4-ylmethyl)chromen-2-one	NA	possibly vanilla	NA	2699	92 48 8	32394	cyclic	coumarin, ketone, benzenoid; HMDB	https://hmdb.ca/metabolites/HMDB0032394	https://pubchem.ncbi.nlm.nih.gov/compound/7092
1,3-Dioxolane-2-propanoic acid, 2,4-dimethyl-, ethyl ester	ethyl 3-(2,4-dimethyl-1,3-dioxolan-2-yl)propanoate	Ethyl Levulinate Propyleneglycol Ketal	oily caramellic	colorless clear liquid	4479	5413 49 0	40433	acid	gamma keto acid; HMDB	https://hmdb.ca/metabolites/HMDB0040433	https://pubchem.ncbi.nlm.nih.gov/compound/221634	https://www.femaflavor.org/flavor-library/ethyl-levulinate-propyleneglycol-ketal
Veratraldehyde propylene glycol acetal	2-butyl-4-methyl-1,3-dioxolane	Valeraldehyde Propyleneglycol Acetal	nuts, fatty	colorless clear liquid	4372	74094-60-3	32551	cyclic	dioxolane; HMDB	https://hmdb.ca/metabolites/HMDB0032551	https://pubchem.ncbi.nlm.nih.gov/compound/156273	https://www.femaflavor.org/flavor-library/valeraldehyde-propyleneglycol-acetal
Ethyl Vanillin	3-ethoxy-4-hydroxybenzaldehyde	Ethyl Vanillin, ethyl protal or bourbonal	floral, vanilla, root beer	white, off white powder	2464	121-32-4	29665	aldehyde	hydroxybenzaldehyde; HMDB	https://hmdb.ca/metabolites/HMDB0029665	https://pubchem.ncbi.nlm.nih.gov/compound/8467	https://www.femaflavor.org/flavor-library/ethyl-vanillin
Benzyl Alcohol (flavor enhancer)	phenylmethanol	benzyl alcohol	Boiled Cherries, Moss, Roasted Bread, Rose	clear colorless liquid with a pleasant odor	2137	100-51-6	3119	cyclic	benzyl alcohol, benzenoid; HMDB	https://hmdb.ca/metabolites/HMDB0003119	https://pubchem.ncbi.nlm.nih.gov/compound/244	https://www.femaflavor.org/flavor-library/benzyl-alcohol
1,3-Dioxan-5-ol, 2-phenyl- (Benzaldehyde glyceryl acetal derivitive)	2-phenyl-1,3-dioxan-5-ol	Benzaldehyde Glyceryl Acetal benzalglycerin or benzylideneglycerol	fruit, cherry, bitter almond, sweet, musty	colorless to pale yellow clear oily liquid	2129	1319-88-6; 1708-40-3; 1708-39-0	32174	cyclic	1,3 dioxane, benzene; HMDB	https://hmdb.ca/metabolites/HMDB0032174	https://pubchem.ncbi.nlm.nih.gov/compound/74362	https://www.femaflavor.org/flavor-library/benzaldehyde-glyceryl-acetal
Acetic acid, hexyl ester	hexyl acetate	Hexyl acetate, N-hexyl ethanoate or hexyl acetic acid	Apple, Banana, Grass, Herb, Pear	colorless liquid with a mild sweet odor	2565	142-92-7	29980	ester	caboxylic acid ester; HMDB	https://hmdb.ca/metabolites/HMDB0029980	https://pubchem.ncbi.nlm.nih.gov/compound/8908	https://www.femaflavor.org/flavor-library/hexyl-acetate
Pentanoic acid, 4-oxo-, 1-methylethyl ester (iso-Propyl levulinate)	propan-2-yl 4-oxopentanoate	iso-Propyl levulinate	NA	colorless clear liquid	NA	21884-26-4	NA	ester	ester; Pubchem	https://pubchem.ncbi.nlm.nih.gov/compound/89084
Butanoic acid (glycerol ester)	butanoic acid	butyric acid	butter, cheese, sour	oily, colorless liquid with an unpleasant odor	2221	107-92-6	NA	acid	fatty acid; LMDB	https://lmdb.ca/metabolites/LMDB00013	https://www.femaflavor.org/flavor-library/butyric-acid	https://pubchem.ncbi.nlm.nih.gov/compound/264
Benzoic acid, 2-amino-, methyl ester	methyl 2-aminobenzoate	methyl anthranilate	Flower, Honey, Peach, grape	clear colorless to tan liquid with an odor of grapes	2682	134-20-3	NA	ester	ester; EBI	https://pubchem.ncbi.nlm.nih.gov/compound/8635	https://www.femaflavor.org/flavor-library/methyl-anthranilate	https://www.ebi.ac.uk/chebi/searchId.do?chebiId=CHEBI:73244
2-Propenoic acid, 3-phenyl-, methyl ester (Cinnamic acid, methyl ester, (E)-)	methyl 3-phenylprop-2-enoate	Methyl cinnamic acid	sweet, balsam, cherry,Balsamic, Strawberry	NA	2698	103-26-4	33833	ester	methyl ester; HMDB	https://hmdb.ca/metabolites/HMDB0033833	https://pubchem.ncbi.nlm.nih.gov/compound/637520	https://www.femaflavor.org/flavor-library/methyl-cinnamate
Butanoic acid, 3-methyl-, propyl ester	propyl 3-methylbutanoate	N-propyl iso-valerate	fruit, apple, bitter, sweet	NA	2960	557-00-6	NA	ester	fatty acid ester; NP-MRD		https://pubchem.ncbi.nlm.nih.gov/compound/11176	https://www.femaflavor.org/flavor-library/propyl-isovalerate
(S)-2-Hydroxypropanoic acid	methoxymethyl (2S)-2-hydroxypropanoate	lactic acid, lactate	odorless, sour	colorless clear viscous liquid or solid	2611	10326-41-7; 79-33-4; 50-21-5	1311	acid	alpha hydroxy acids and derivatives, organic acids; HMDB	https://hmdb.ca/metabolites/HMDB0001311	https://pubchem.ncbi.nlm.nih.gov/compound/612	https://www.femaflavor.org/flavor-library/lactic-acid
Pentanoic acid, 4-oxo-, butyl ester	butyl 4-oxopentanoate	butyl levulinate	fruit, waxy, herbal, savory	colorless to pale yellow clear liquid	2207	2052 15 5	40165	acid	gamma keto acid , organic acids and derivatives; HMDB	https://hmdb.ca/metabolites/HMDB0040165	https://pubchem.ncbi.nlm.nih.gov/compound/16331	https://www.femaflavor.org/flavor-library/butyl-levulinate
Limonene	1-methyl-4-prop-1-en-2-ylcyclohexene	limonene	citrus, mint	colorless liquid	1326	5989-27-5	4321	cyclic	monoterpene; HMDB	https://hmdb.ca/metabolites/HMDB0004321	https://pubchem.ncbi.nlm.nih.gov/compound/22311	https://www.femaflavor.org/flavor-library/d-limonene
5-Thiazoleethanol, 4-methyl-	2-(4-methyl-1,3-thiazol-5-yl)ethanol	sulfurol	nuts, sulfur, meaty, brothy, roasted, metallic	colorless to pale yellow clear oily liquid	3204	137-00-8	32985	cyclic	4,5-disubstituted thiazoles, azoles, aromatic, heterocyclic; HMDB	https://hmdb.ca/metabolites/HMDB0032985	https://pubchem.ncbi.nlm.nih.gov/compound/1136	https://www.femaflavor.org/flavor-library/4-methyl-5-thiazoleethanol
Cyclohexanol, 1-methyl-4-(1-methylethyl)-	1-methyl-4-propan-2-ylcyclohexan-1-ol	p-Menthan-1-ol	herbal, woody	colorless liquid to solid	NA	21129-27-1	37020	cyclic	menthane monoterpenoid, monoterpenoids; HMDB	https://hmdb.ca/metabolites/HMDB0037020	https://pubchem.ncbi.nlm.nih.gov/compound/89437
N-Acetyl-4-(2',3'-dihydroxypropoxy)phenylacetamide	N-acetyl-2-[4-(2,3-dihydroxypropoxy)phenyl]acetamide	NA	potentially green vegetables	NA	NA	NA	NA	nitrogen	acetamide; pubchem	https://pubchem.ncbi.nlm.nih.gov/compound/575862
N-Ethyl-4-hydroxypiperidine	1-ethylpiperidin-4-ol	N-Ethyl-4-hydroxypiperidine	heavy floral, animal, potentially black pepper	colorless fuming liquid	NA	3518-83-0	NA	nitrogen	piperidine, ring structure; Pubchem	https://pubchem.ncbi.nlm.nih.gov/compound/77056
Non-7-enoic acid, dimethylamide	(Z)-N,N-dimethylnon-7-enamide	NA	NA	NA	NA	NIST # 187265	NA	nitrogen	amide; Pubchem	https://pubchem.ncbi.nlm.nih.gov/compound/5368099#section=Spectral-Information
Triacetin	2,3-diacetyloxypropyl acetate	Tri-Acetin	NA	NA	2007	102-76-1	29592	glycerolipid	TAG, lipid, glycerolipid; HMDB	https://hmdb.ca/metabolites/HMDB0029592	https://pubchem.ncbi.nlm.nih.gov/compound/5541	https://www.femaflavor.org/flavor-library/tri-acetin
(2(3H)-Furanone, 5-heptyldihydro-)	5-heptyloxolan-2-one	gamma-Undecalactone	Apricot, Fruit	colorless clear liquid	3091	104-67-6	NA	cyclic	lactone; EBI	https://www.ebi.ac.uk/chebi/searchId.do?chebiId=89362	https://pubchem.ncbi.nlm.nih.gov/compound/7714#section=Depositor-Supplied-Synonyms	https://www.femaflavor.org/flavor-library/gamma-undecalactone
Benzyl Benzoate	benzyl benzoate	benzyl benzoate	Balsamic, Herb, Oil, sweet, and almond	NA	2138	120-51-4	14814	cyclic	benzoic acid ester, benzenoid; HMDB	https://hmdb.ca/metabolites/HMDB0014814	https://pubchem.ncbi.nlm.nih.gov/compound/2345	https://www.femaflavor.org/flavor-library/benzyl-benzoate
1,2,3-Propanetriol, monoacetate/ Acetin	2,3-dihydroxypropyl acetate	glyceryl acetate	NA	colorless clear liquid	NA	100-78-7	31712	glycerolipid	DAG, diester; Pubchem	https://hmdb.ca/metabolites/HMDB0031712
1R-a-Pinene	(1R,5R)-2,6,6-trimethylbicyclo[3.1.1]hept-2-ene	alpha-Pinene	Cedarwood, Pine, Sharp	NA	2902	80-56-8; 7785-26-4; 7785-70-8	6525	cyclic	terpene; HMDB	https://hmdb.ca/metabolites/HMDB0006525	https://pubchem.ncbi.nlm.nih.gov/compound/6654	https://www.femaflavor.org/flavor-library/alpha-pinene
Salicylic acid	2-hydroxybenzoic acid	salicylic acid	none	odorless white to light tan solid	3985	69-72-7	NA	cyclic	benzenoid; YMDB	https://www.ymdb.ca/compounds/YMDB01322
2H-1-Benzopyran-2-one, 3,4-dihydro-	6-hydroxy-3,4-dihydrochromen-2-one	dihydrocoumarin, 3,4-dihydrocoumarin or 1,2-benzodihydropyrone	sweet, almond, and cinnamon	NA	NA	119-84-6	36626	cyclic	coumarin, benzenoid; Pubchem	https://hmdb.ca/metabolites/HMDB0036626
Oxiranecarboxylic acid, 3-methyl-3-phenyl-, ethyl ester, cis-	ethyl (2R,3R)-3-methyl-3-phenyloxirane-2-carboxylate	NA	NA	NA	NA	19464-95-0	31729	cyclic	oxirane carboxylic acid, benzene, epoxide; HMDB	https://hmdb.ca/metabolites/HMDB0031729
1-Deoxy-d-arabitol	4-methyl-2-phenyl-1,3-dioxepane-5,6-diol	NA	NA	NA	NA	13942-77-3	41486	alcohol	secondary alcohol; HMDB	https://hmdb.ca/metabolites/HMDB0041486
2H-Pyran-2-one, 6-heptyltetrahydro-	(6R)-6-heptyloxan-2-one	Delta-Dodecalactone	fruit tropical, peach, coconut, apricot, milk	NA	2401	713-95-1	37116	cyclic	fatty ester lipid, lactone, organoheterocyclic; HMDB	https://hmdb.ca/metabolites/HMDB0037116	https://pubchem.ncbi.nlm.nih.gov/compound/270738#section=Depositor-Supplied-Synonyms	https://www.femaflavor.org/flavor-library/delta-dodecalactone
Pentanoic acid, 2-acetyl-4-methyl-, ethyl ester	ethyl 2-acetyl-4-methylpentanoate	NA	sweet and fruity	NA	NA	1522-34-5	31579	ester	fatty acid ester; HMDB	https://hmdb.ca/metabolites/HMDB0031579
Vanillin, acetate	(4-formyl-2-methoxyphenyl) acetate	Vanillin acetate	floral	NA	3108	881-68-5	29663	cyclic	phenol esters; HMDB	https://hmdb.ca/metabolites/HMDB0029663	https://pubchem.ncbi.nlm.nih.gov/compound/61229	https://www.femaflavor.org/flavor-library/vanillin-acetate
3-Buten-2-one, 4-(2,6,6-trimethyl-1-cyclohexen-1-yl)-, (E)-	3-methyl-4-(2,6,6-trimethylcyclohexen-1-yl)but-3-en-2-one	Methyl ionone delta,Beta-Isomethylionine	floral	NA	4151	79-89-0	6189	cyclic	sesquiterpenoids; ContaminantDB	https://contaminantdb.ca/contaminants/CHEM006189
Neonicotine	3-[(2S)-piperidin-2-yl]pyridine	NA	NA	NA	NA	494-52-0	NA	nitrogen	NA	https://pubchem.ncbi.nlm.nih.gov/compound/205586
Nicotine-1N'-oxide	3-[(2S)-1-methylpyrrolidin-2-yl]-1-oxidopyridin-1-ium	NA	NA	NA	NA	2820-55-5	NA	nitrogen	NA	https://pubchem.ncbi.nlm.nih.gov/compound/211457
Nicotine	3-[(2S)-1-methylpyrrolidin-2-yl]pyridine	NA	NA	NA	NA	54-11-5; 22083-74-5	NA	nitrogen	NA	https://pubchem.ncbi.nlm.nih.gov/compound/89594
***cyclic molecules include, but not limited to, the following types of chemistries: coumarins, lactones, benzenoids, heterocyclic, pyranone and dioxanes
